# Supplementary material for: Electrochemical fabrication of two-dimensional copper oxide nanosheets on stainless steel as a fiber coating for highly sensitive solid-phase microextraction of ultraviolet filters
Source: Royal Society of Chemistry journal article supplement (doi:10.1039/c8ay01158c), 2018-01-01
Supplement: c8ay01158c1.pdf [file c8ay01158c1.pdf]

**Figure caption**

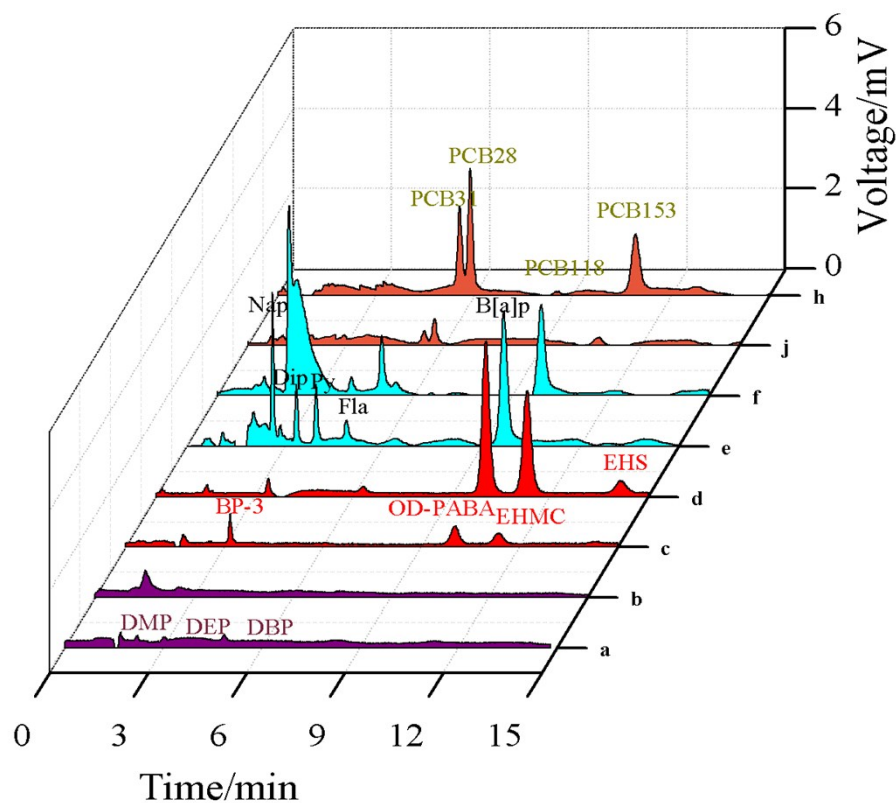

**Fig. S1** Typical chromatograms of direct HPLC for PAEs (a), UV filters (c), PAHs (e) and PCBs (j) as well as corresponding SPME-HPLC with CuO coated fiber for PAEs (b), UV filters (d), PAHs (f) and PCBs (h) for water spiked with 100  $\mu\text{g L}^{-1}$  each analyte, except for B[a]p spiked with 25  $\mu\text{g L}^{-1}$ .

Table S1 EDS result of CuO nano-coating

| Element         | Line style      | Apparent concentration | K ratio | wt%    | wt% Sigma | Standard sample label | Manufacturer's standard |
|-----------------|-----------------|------------------------|---------|--------|-----------|-----------------------|-------------------------|
| C               | K linear system | 18.47                  | 0.18469 | 6.22   | 0.41      | C Vit                 | yes                     |
| O               | K linear system | 101.22                 | 0.34063 | 8.09   | 0.35      | SiO <sub>2</sub>      | yes                     |
| Cl              | K linear system | 57.62                  | 0.50354 | 9.87   | 0.71      | NaCl                  | yes                     |
| Cu              | L linear system | 133.77                 | 1.33765 | 33.58  | 1.02      | Cu                    | yes                     |
| Au <sup>a</sup> | M linear system | 137.11                 | 1.37109 | 42.24  | 1.47      | Au                    | yes                     |
| amount          |                 |                        |         | 100.00 |           |                       |                         |

<sup>a</sup>. to spray on sample surface for SEM test.
